# Supplementary material for: Wintertime Production and Storage of Methane in Thermokarst Ponds of Subarctic Norway
Source: Copernicus journal article supplement (doi:10.5194/egusphere-2025-3059), 2025-07-04
Supplement: Supplementary file 1 [file egusphere-2025-3059-supplement.pdf]

## Supplementary material

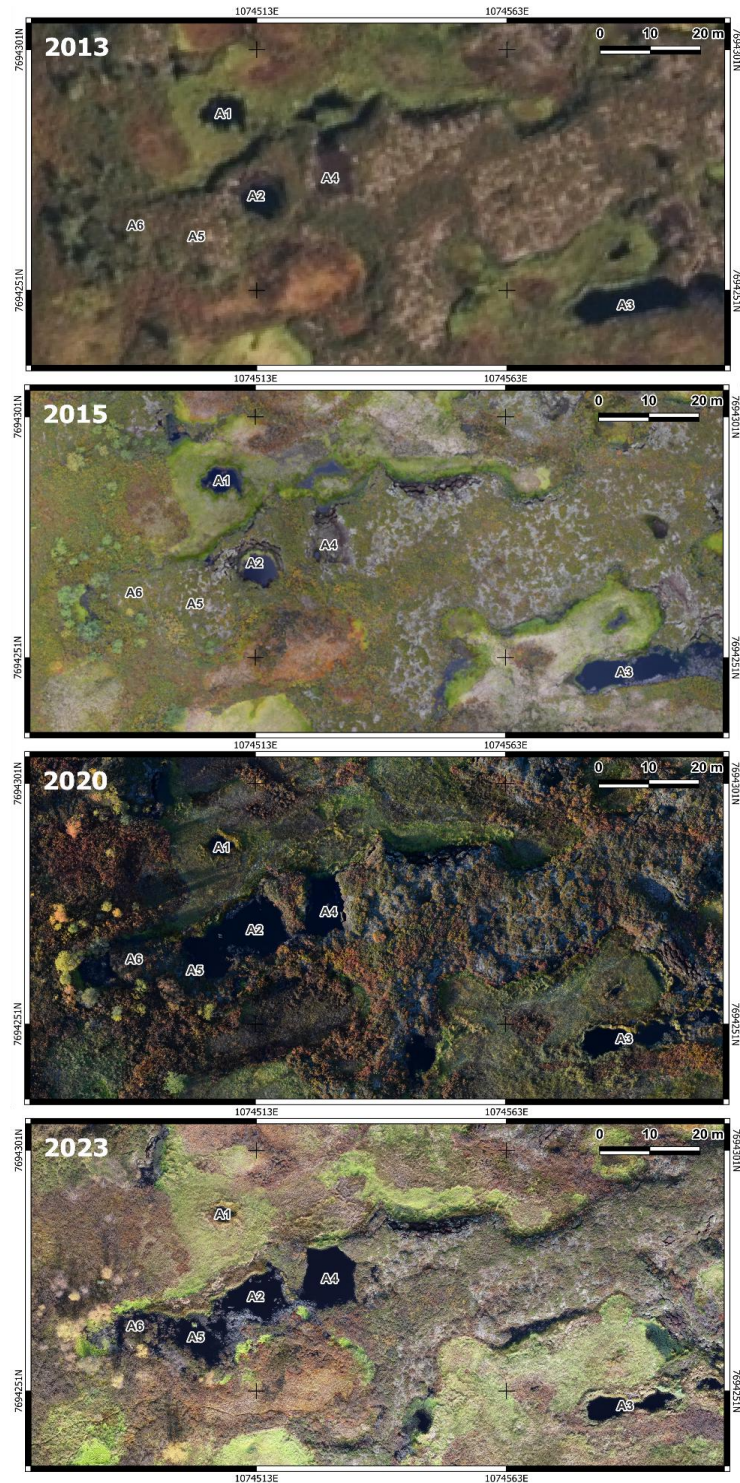

**Figure S1:** Aerial images of the main study area in Áidejávri (A1-A6) from 2013 to 2023 illustrate the degradation of the peat plateau. The aerial image from 2013 was obtained from the Norwegian Mapping Authority (Norgebilder.no, 2025), while orthophotos from 2015, 2020, and 2023 were made through drone surveys and processed following the method described in Martin et al., 2021. The figure illustrates that the thermokarst pond formation age was identified as the time of permafrost collapse and not the start of water accumulation, as demonstrated in the case of pond A4. In pond A4, the

permafrost started to collapse in 2013, and the pond was already established by 2020. Thus, the approximate age of the pond has been identified as 7 years as of 2023. Coordinate system is EPSG25832: ETRS89/UTM zone 32N.

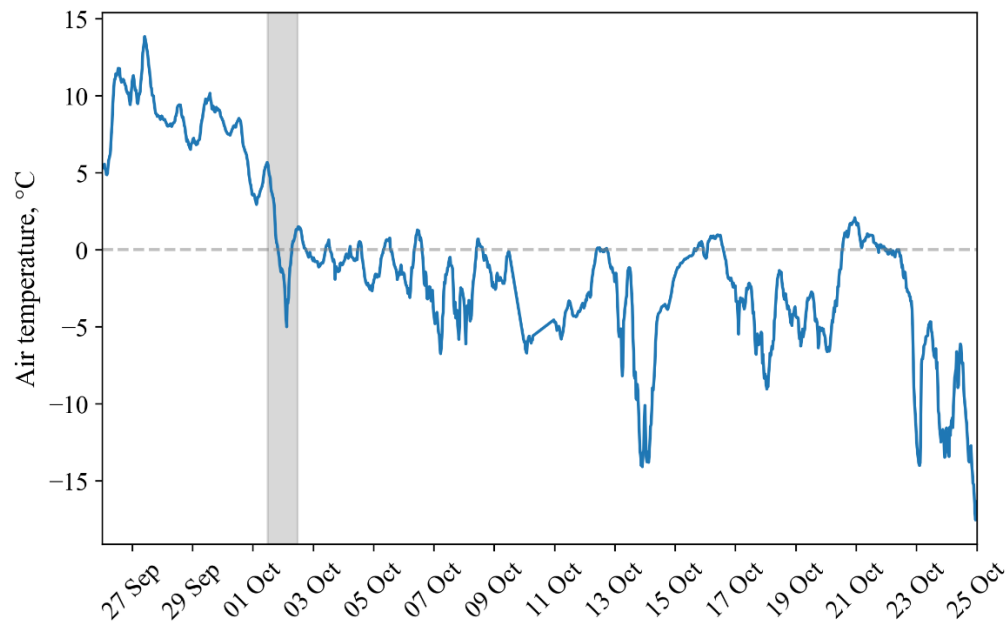

Figure S2. Air temperature measured from September 26, 2023, to October 25, 2023, using a resistance temperature detector (PT-100) located in a radiation shield at 2 m above ground level (a.g.l.) on the eddy covariance tower in Ískoras (Pirk et al., 2024). The beginning of ice formation in 2023 is shown with grey shading.

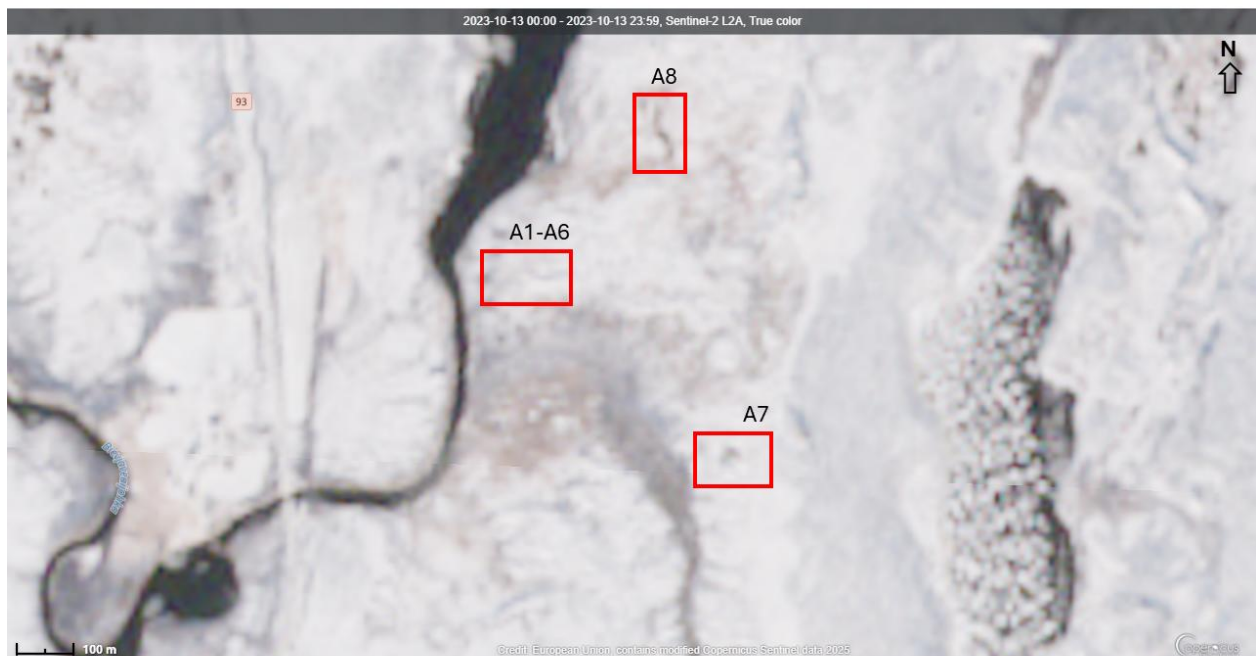

Figure S3. Sentinel-2 L2A image of the Áidejávri area taken on October 13, 2023, from Copernicus Data Browser, <https://browser.dataspace.copernicus.eu/> (accessed September 2024 and May 2025). The studied ponds in Áidejávri are indicated with red rectangles. The image shows that, by October 13, the ponds in Áidejávri were ice-covered.

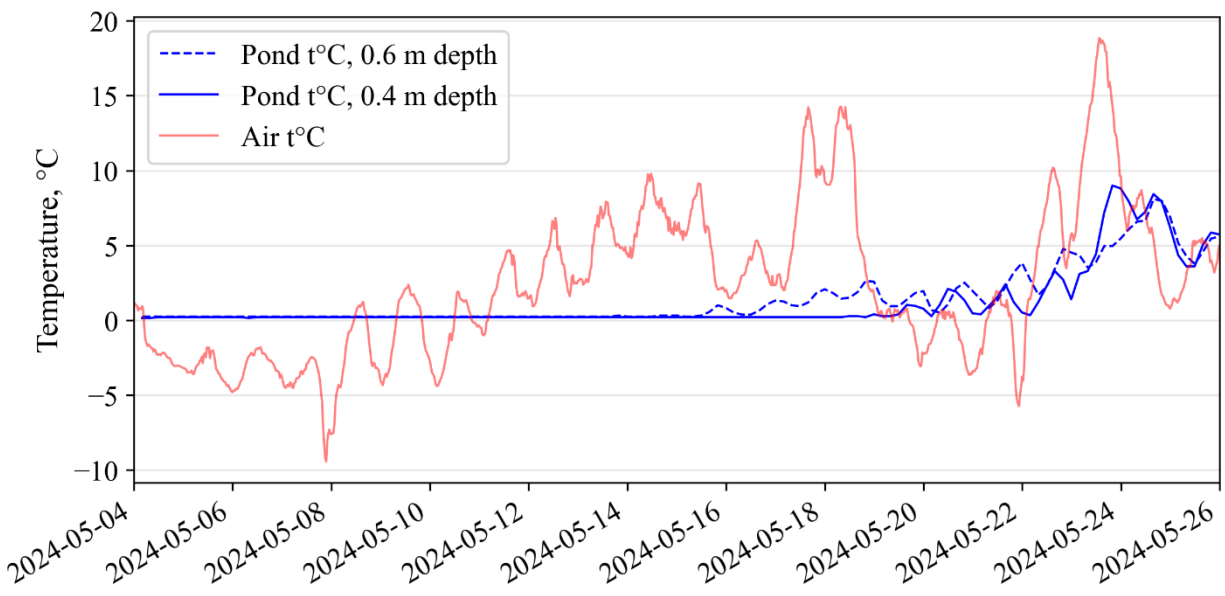

Figure S4. Air and water temperatures of the pond at Iškoras (Isk) measured between May 4 and May 26, 2024. Water temperatures were recorded using automatic data loggers (iButton) at two depths: 0.4 m and 0.6 m (bottom). Air temperature was measured with a resistance temperature detector (PT-100) located in a radiation shield at 2 m above ground level (a.g.l.) on the eddy covariance tower in Iškoras (Pirk et al., 2024).

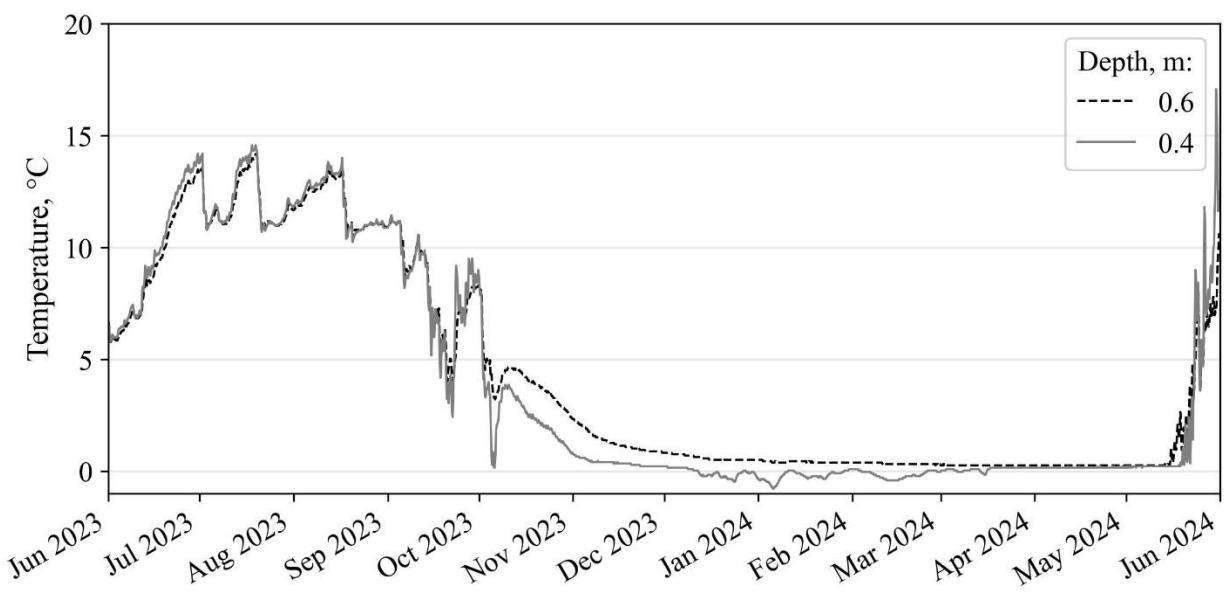

Figure S5. Water temperature measured in pond Isk at Iškoras at two depths: 0.4 m and 0.6 m (bottom). Temperatures were recorded using automatic data loggers (iButton).

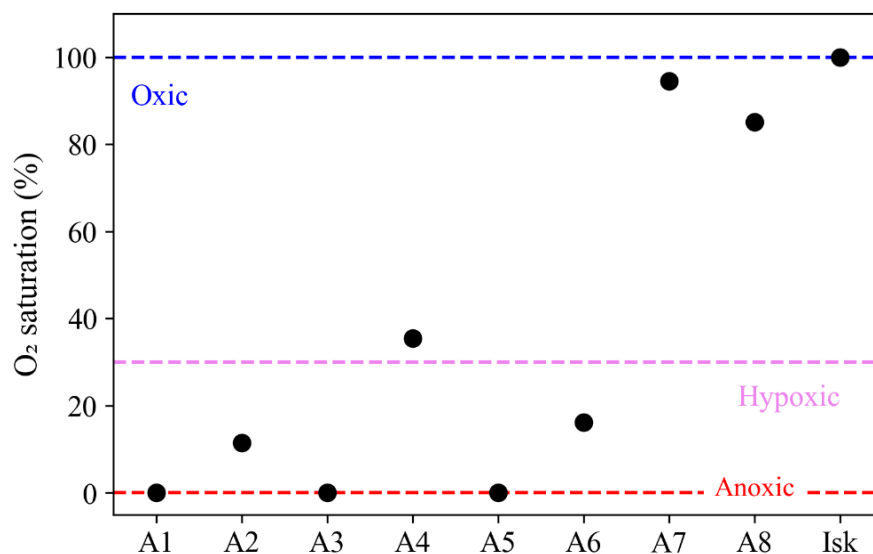

**Figure S6.** Oxygen saturation in surface water during September 2024 relative to atmospheric equilibrium. Oxygen conditions are classified as oxic (more than 30 %), hypoxic (below 30 %), and as anoxic when saturation values were below 1 %. We estimated a high absolute error of 20 % in oxygen saturation measurements due to significant differences observed between measured values in replicate samples.

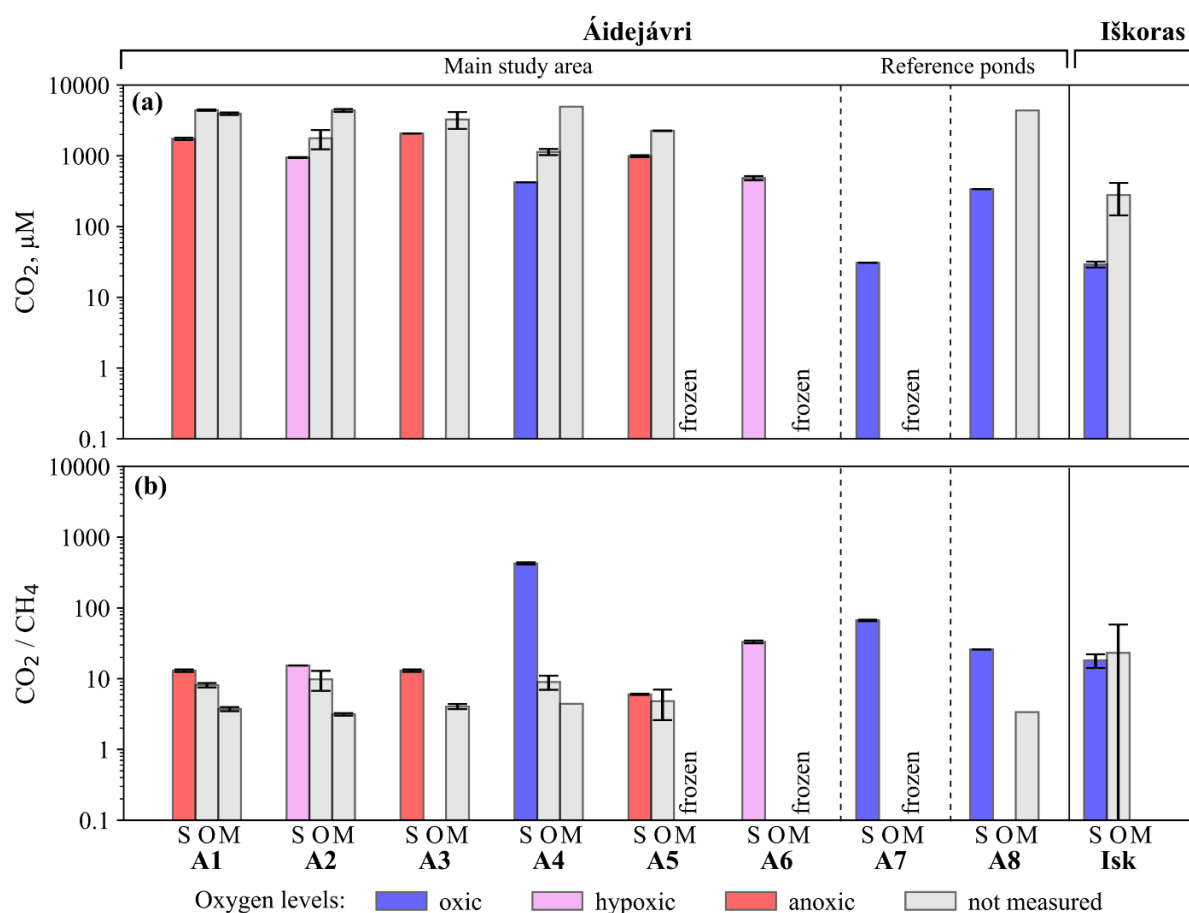

Figure S7. Dissolved CO<sub>2</sub> concentrations (a) and CO<sub>2</sub>/CH<sub>4</sub> ratio (b) in the unfrozen water column of the studied ponds across each season (March - M, September - S, and October - O, 2024). Error bars represent the standard deviations of multiple samples collected from different depths in March and October, as well as replicate samples taken in September from the same depth.

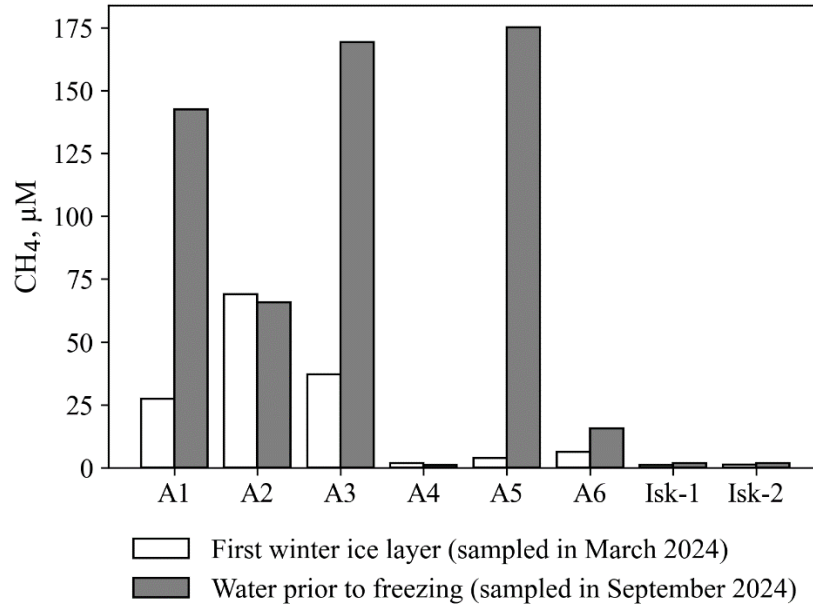

Figure S8. Mean CH<sub>4</sub> concentrations in the first winter ice layer formed (sampled in March 2024) and in the water prior to freezing (sampled in September 2024). Both were calculated using solubility constants corrected for 0°C.

Table S1. Mean pH and Dissolved Organic Content (DOC) of ice layers.

| Ice core | Depth from, m | Depth to, m | Description of ice bubbles       | DOC, mg L <sup>-1</sup> | pH  |
|----------|---------------|-------------|----------------------------------|-------------------------|-----|
| A1       | 0             | 0.06        | Superimposed                     | 22                      | 5.2 |
|          | 0.06          | 0.35        | Clear ice                        | 3.6                     | 6.2 |
|          | 0.35          | 0.49        | Mixed bubbles                    | 3.2                     | 6.2 |
| A2       | 0             | 0.13        | Ebullition bubbles               | 3.8                     | 6.6 |
|          | 0.13          | 0.22        | Spherical and nut shaped bubbles | 3.0                     | 6.5 |
|          | 0.22          | 0.30        | Spherical and nut shaped bubbles | 5.4                     | 5.9 |
|          | 0.30          | 0.42        | Mixed bubbles                    | 3.0                     | 6.1 |
|          | 0.42          | 0.46        | Mixed bubbles                    | 3.8                     | 5.8 |
| A3       | 0             | 0.28        | Superimposed                     | 14                      | 6.4 |
|          | 0.28          | 0.36        | Ebullition bubbles               | 4.0                     | 6.2 |
|          | 0.36          | 0.46        | Clear ice                        | 4.8                     | 6.2 |
|          | 0.46          | 0.53        | Spherical and nut shaped bubbles | 4.4                     | 6.3 |

|       |      |      |                                  |     |     |
|-------|------|------|----------------------------------|-----|-----|
| A4    | 0    | 0.25 | Ebullition bubbles               | 3.3 | 6.0 |
|       | 0.25 | 0.33 | Mixed bubbles                    | 3.2 | 6.0 |
|       | 0.33 | 0.58 | Mixed bubbles                    | 4.4 | 5.9 |
| A5    | 0    | 0.06 | Superimposed                     | 17  | 5.8 |
|       | 0.06 | 0.15 | Clear ice                        | 3.1 | 6.1 |
|       | 0.15 | 0.22 | Spherical and nut shaped bubbles | 36  | 4.9 |
|       | 0.22 | 0.39 | Mixed bubbles                    | 8.7 | 5.2 |
|       | 0.39 | 0.56 | Frozen peat                      | 110 | 4.4 |
| A6    | 0    | 0.27 | Superimposed                     | 20  | 5.6 |
|       | 0.27 | 0.40 | Clear ice                        | 4.1 | 5.9 |
|       | 0.40 | 0.49 | Mixed bubbles                    | 160 | 4.6 |
|       | 0.49 | 0.53 | Frozen peat                      | 150 | 4.4 |
| A7    | 0    | 0.13 | Clear ice                        | 3.2 | 6.2 |
|       | 0.13 | 0.28 | Elongated bubbles                | 3.4 | 6.3 |
|       | 0.28 | 0.42 | Elongated bubbles                | 2.8 | 6.1 |
|       | 0.42 | 0.58 | Mixed bubbles                    | 19  | 5.4 |
| A8    | 0    | 0.06 | Superimposed                     | 7.4 | 8.1 |
|       | 0.06 | 0.18 | Clear ice                        | 2.1 | 6.4 |
|       | 0.18 | 0.29 | Elongated bubbles                | 2.2 | 6.2 |
|       | 0.29 | 0.45 | Elongated bubbles                | 2.8 | 6.3 |
| Isk-1 | 0    | 0.05 | Superimposed                     | 12  | 4.8 |
|       | 0.05 | 0.15 | Clear ice                        | 4.6 | 5.6 |
|       | 0.15 | 0.25 | Mixed bubbles                    | 3.5 | 5.6 |
|       | 0.25 | 0.37 | Mixed bubbles                    | 67  | 5.0 |
|       | 0.37 | 0.5  | Mixed bubbles                    | 115 | 5.3 |
| Isk-2 | 0    | 0.06 | Superimposed                     | 18  | 4.9 |
|       | 0.06 | 0.22 | Clear ice                        | 2.5 | 5.8 |
|       | 0.22 | 0.26 | Spherical and nut shaped bubbles | 2.7 | 5.8 |
|       | 0.26 | 0.42 | Mixed bubbles                    | 6.4 | 5.6 |
|       | 0.42 | 0.55 | Mixed bubbles                    | 7.7 | 5.4 |



**Table S2. Methane (CH<sub>4</sub>) storages before ice formation, in the ice column and in water column below ice.**

|       | CH <sub>4</sub> storages, mg CH <sub>4</sub> -C m <sup>-2</sup> |            |                        | Winter methane bottom flux, mg CH <sub>4</sub> -C m <sup>-2</sup> d <sup>-1</sup> |
|-------|-----------------------------------------------------------------|------------|------------------------|-----------------------------------------------------------------------------------|
|       | Water column before ice formation                               | Ice column | Water column below ice |                                                                                   |
| A1    | 1326 ± 905                                                      | 411 ± 62   | 10303 ± 1372           | 59 ± 11                                                                           |
| A2    | 1174 ± 86                                                       | 1580 ± 259 | 16626 ± 1874           | 107 ± 14                                                                          |
| A3    | 1364 ± 881                                                      | 296 ± 76   | 5524 ± 1008            | 28 ± 8.6                                                                          |
| A4    | 14 ± 4                                                          | 1120 ± 147 | 3347 ± 1349            | 28 ± 8.7                                                                          |
| A5    | 419 ± 415                                                       | 5010 ± 473 | -                      | 29 ± 4.3                                                                          |
| A6    | 46 ± 23                                                         | 443 ± 221  | -                      | 2.8 ± 1.4                                                                         |
| A7    | 2 ± 1                                                           | 854 ± 102  | -                      | 5.3 ± 0.7                                                                         |
| A8    | 69 ± 67                                                         | 285 ± 54   | 5474 ± 1588            | 36 ± 10                                                                           |
| Isk-1 | 10 ± 4                                                          | 524 ± 104  | (1271 ± 1273) *        | 3.2 ± 0.7(11 ± 8) *                                                               |
| Isk-2 | 11 ± 4                                                          | 1785 ± 319 | (636 ± 636) *          | 11 ± 2.1(15 ± 4.5) *                                                              |

\*The values estimated based on the assumption of dissolved methane storage under the ice in Iškoras pond (Sect. 3.5).

**Table S3. Mean CH<sub>4</sub> ice-free flux measured for ponds by the eddy covariance tower at the Iškoras site (Pirk et al., 2024) over three years (2019-2021). The ice-free period was defined as June 10 to September 10 to exclude contributions from ice melt and autumn turnover. The mean temperature of the pond during this period in 2023 was 11.4°C.**

| Year | Ice-free CH <sub>4</sub> flux, mg CH <sub>4</sub> -C m <sup>-2</sup> d <sup>-1</sup> |     |      |      |
|------|--------------------------------------------------------------------------------------|-----|------|------|
|      | mean                                                                                 | std | 25th | 75th |
| 2019 | 37                                                                                   | 20  | 24   | 49   |
| 2020 | 40                                                                                   | 22  | 25   | 54   |
| 2021 | 39                                                                                   | 20  | 26   | 53   |

## References

Norgebilder.no: Statens kartverk, Geovekst og kommunene: Kautokeino 1958, Alta Kautokeino riksgrensen 1966, Roavvoaivi 2003, Finnmark 2013, Karasjok 2003, Finnmark 2011, <https://www.norgebilder.no/>, last access: 03 June 2025.

Pirk, N., Aalstad, K., Mannerfelt, E. S., Clayer, F., De Wit, H., Christiansen, C. T., Althuizen, I., Lee, H., and Westermann, S.: Disaggregating the Carbon Exchange of Degrading Permafrost Peatlands Using Bayesian Deep Learning, *Geophysical Research Letters*, 51, e2024GL109283, <https://doi.org/10.1029/2024GL109283>, 2024.
